# Supplementary material for: Consumption of kiwifruit capsules increases Faecalibacterium prausnitzii abundance in functionally constipated individuals: a randomised controlled human trial
Source: PubMed Central journal article supplement (PMC5672330; doi:10.1017/jns.2017.52), 2017-10-12
Supplement: S2048679017000520sup001.pdf [file S2048679017000520sup001.pdf]

## Supplementary Figures

**Figure S1.** Schematic of trial treatments, washouts and sampling points.

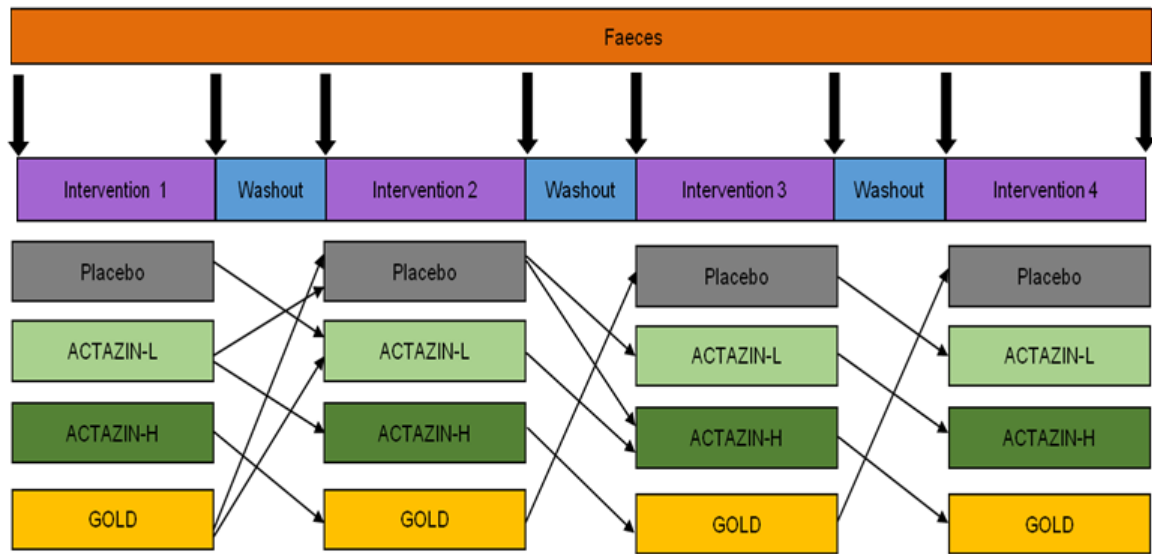

**Figure S2.** SmartPill® data output for a single participant showing pressure (red), temperature (blue) and pH (green) measurements *in situ* during gastrointestinal transit. Transit events (ingestion, gastric emptying, ileocecal junction, exiting the body) are shown (blue, grey, green and pink bars, respectively).

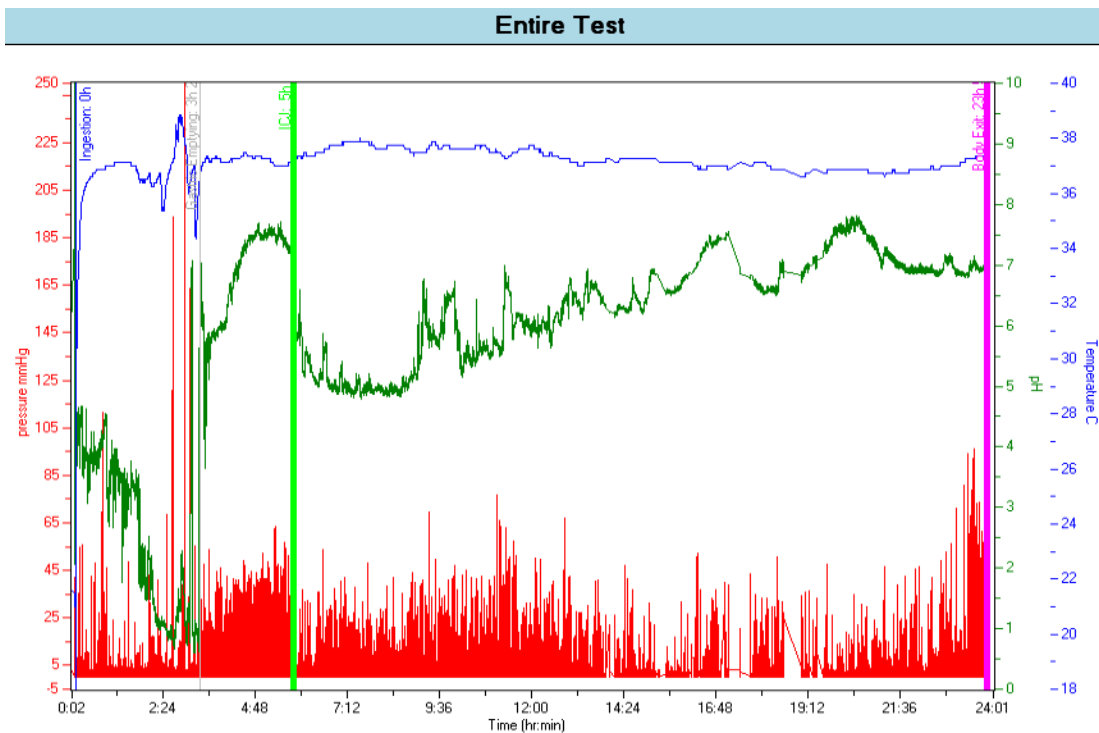

**Figure S3.** Net change in *Faecalibacterium prausnitzii* abundance after Livaux treatment for the nine participants of the functionally constipated group as measured by Illumina MiSeq sequencing.

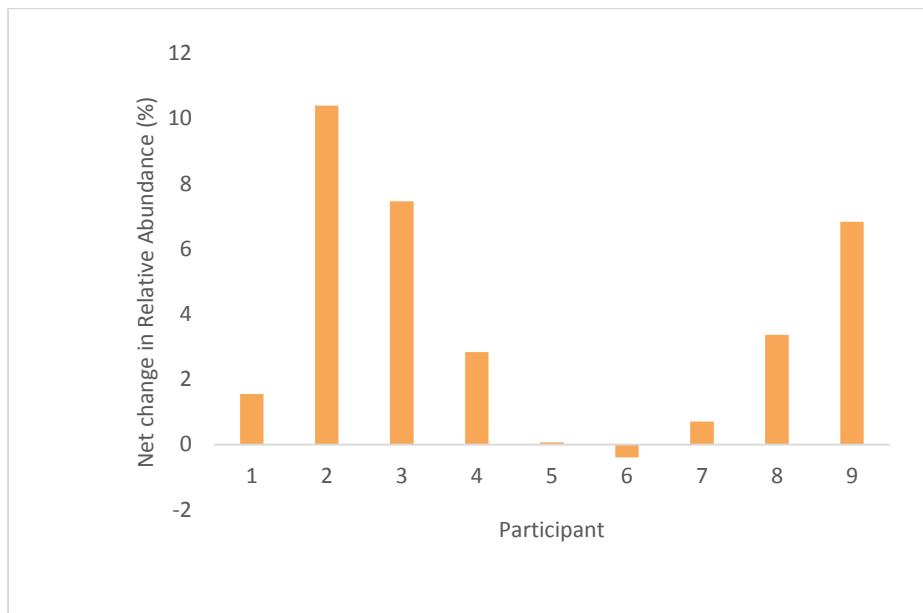

**Table S4.** Average distal colonic pH data from SmartPill® measurements from the six participants while on the placebo or ACTAZIN™ H treatments. Standard error of the mean (SEM).

|               | <b>Placebo</b> | <b>Actazin™ H</b> |
|---------------|----------------|-------------------|
| Participant 1 | 7.00           | 6.30              |
| Participant 2 | 6.84           | 6.70              |
| Participant 3 | 6.10           | 6.03              |
| Participant 4 | 6.30           | 5.78              |
| Participant 5 | 5.90           | 6.77              |
| Participant 6 | 5.67           | 6.70              |
| Average       | 6.30           | 6.38              |
| SEM           | 0.21           | 0.17              |
